# Supplementary material for: Mass production of graphene nanoscrolls and their application in high rate performance supercapacitors
Source: Royal Society of Chemistry journal article supplement (doi:10.1039/c5nr07067h), 2015-11-26
Supplement: c5nr07067h1.pdf [file c5nr07067h1.pdf]

## **Supplementary information**

### **Massive Production of Graphene Nanoscrolls and Their Assist for High Rate Performance Supercapacitors**

**Bingna Zheng, Zhen Xu, Chao Gao\***

MOE Key Laboratory of Macromolecular Synthesis and  
Functionalization, Department of Polymer Science and Engineering,  
Zhejiang University, 38 Zheda Road, Hangzhou 310027, P. R. China.

\* To whom correspondence should be addressed. E-mail:

[chaogao@zju.edu.cn](mailto:chaogao@zju.edu.cn)

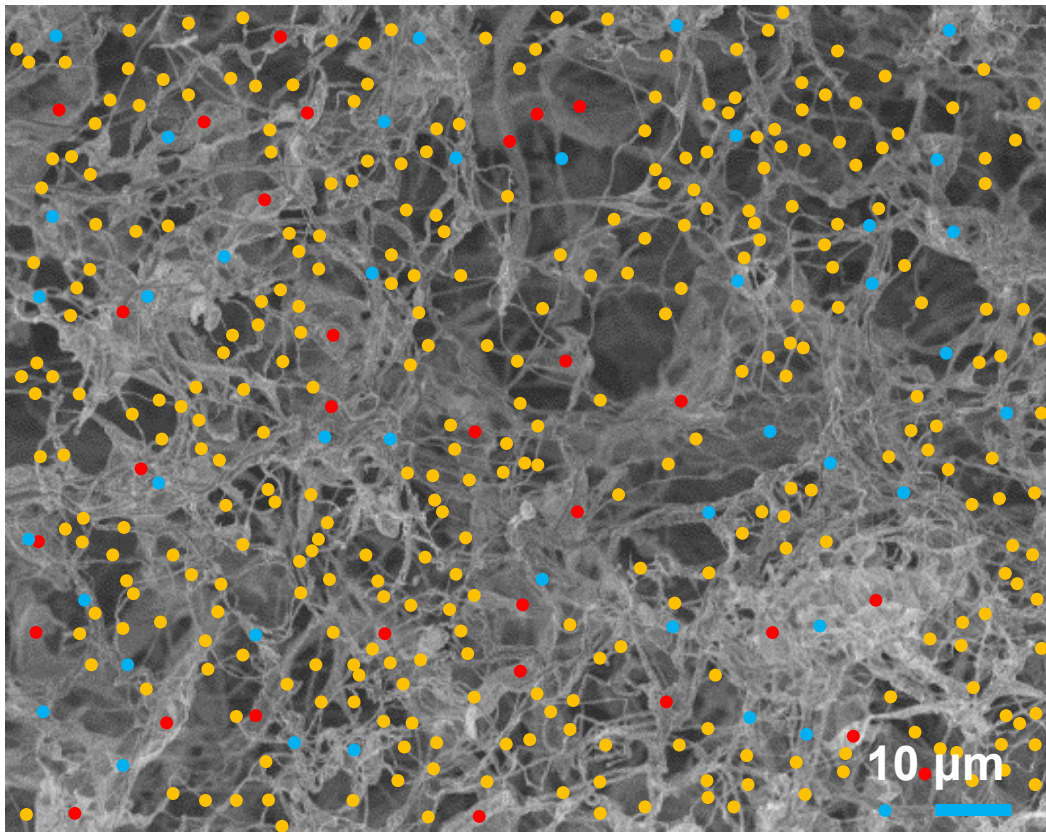

Figure S1 SEM image for the assessment of the efficiency to transform CRG to GNS at the concentration of 0.5 mg/mL. The red dots indicate CRG sheets, the yellow dots indicate GNSs and blue dots indicate GNS bundles. Through counting, there are 309 GNSs, 30 CRG sheets, and 42 GNS bundles. The minimal yield was calculated as  $(309+42)/(309+42+30) \times 100\% \approx 92\%$ .

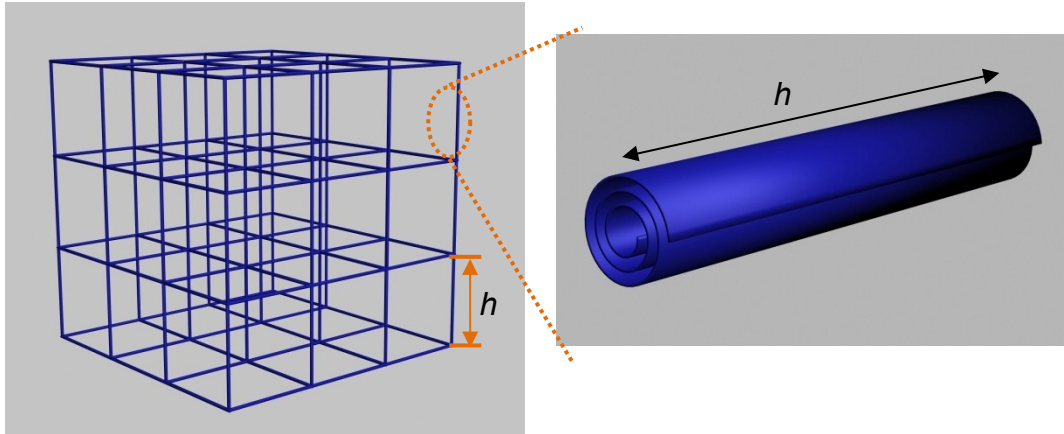

Figure S2. Density calculation model.

Here, we assume that a cubic framework is made up of 12 rigid GNSs with the same length  $h$ . Because of the open morphology of GNS, the mass of a GNS  $m' = A/S$ , where  $A$  is the area of one GNS and  $S$  is the specific surface area of graphene sheet. Assuming that GNS is formed by a piece of square-shaped graphene sheet and the length of GNS equals the length of the square. Therefore, the calculated density of GNS foam  $\rho$  is:

$$\rho = \frac{12m'}{4V} = \frac{12 \times \left(\frac{2h^2}{S}\right)}{4h^3} = \frac{6}{Sh}$$

All the above formula is based on the assumption of rigid GNSs and easy connections between GNSs. As to the real case, GNS is flexible and the interactions between GNSs are weak physical entanglements. The above reason hinders the decrease of density in experiment: GNSs tend to collapse when the intrinsic elastic force and physical entanglement force are hard to bear their self-weight.



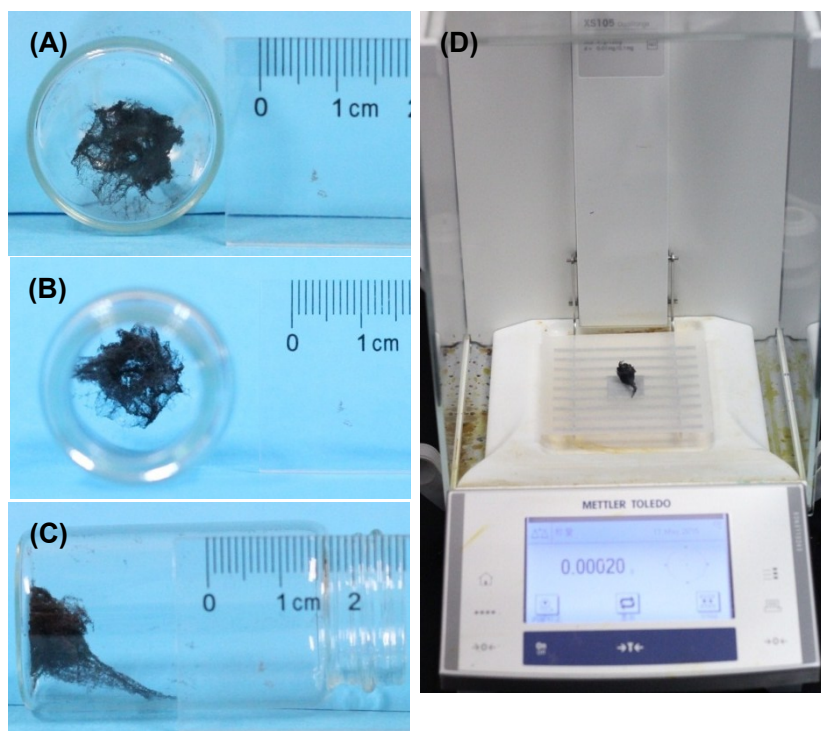

Figure S3. (A) bottom, (B) top, (C) side views of GNS1; (D) Weight of GNS1 sample. The volume of GNS1 foam is 2 ml according to the volume calculation formula of circular truncated cone:  $V = \frac{1}{3} \pi h (R^2 + r^2 + Rr)$ . ( $h = 0.8 \text{ cm}$ ,  $R = 1.0 \text{ cm}$ ,  $r = 0.8 \text{ cm}$ )

Table S1 Specific capacitances and retention rates of GNSs and MWNTs  
(calculated by CV, the electrolyte is 1M H<sub>2</sub>SO<sub>4</sub>)

| Scan rate (mV/s) | GNS2     |               | GNS3     |               | GNS4     |               | GNS5     |               | MWNT     |               |
|------------------|----------|---------------|----------|---------------|----------|---------------|----------|---------------|----------|---------------|
|                  | Cs (F/g) | Retention (%) |
| 10               | 91.0     | 100           | 91.4     | 100           | 103.6    | 100           | 99.0     | 100           | 46.7     | 100           |
| 20               | 88.5     | 97.2          | 89.0     | 97.4          | 99.7     | 96.2          | 94.5     | 95.5          | 44.5     | 94.7          |
| 50               | 84.2     | 92.5          | 84.2     | 92.1          | 94.7     | 91.4          | 88.0     | 88.9          | 41.5     | 89.0          |
| 80               | 82.3     | 90.4          | 81.9     | 89.6          | 90.8     | 89.7          | 81.9     | 82.7          | 40.1     | 85.9          |
| 100              | 82.3     | 90.4          | 80.8     | 88.4          | 90.0     | 86.8          | 79.5     | 80.3          | 39.3     | 84.2          |
| 200              | 77.5     | 85.2          | 75.0     | 82.1          | 84.0     | 81.1          | 72.0     | 72.7          | 36.6     | 78.4          |
| 500              | 69.6     | 76.5          | 60.0     | 65.6          | 75.6     | 73.0          | 60.0     | 60.6          | 31.3     | 67.1          |
| 800              | 64.6     | 71.0          | 57.5     | 62.9          | 70.5     | 68.1          | 56.3     | 56.8          | 28.3     | 60.6          |
| 1000             | 61.8     | 67.9          | 51.0     | 59.1          | 67.9     | 65.5          | 50.0     | 50.5          | 26.4     | 56.6          |
| 2000             | 53       | 58.2          | 41.5     | 45.4          | 58.5     | 56.5          | 45.0     | 45.5          | 19.8     | 42.5          |

The specific capacitance of single electrode based on CV curve is:

$$C_m = \frac{\int_{U_1}^{U_2} IdU + \int_{U_2}^{U_1} IdU}{m \times u \times (U_2 - U_1)}$$

Where  $C_m$  (F/g) is the specific capacitance,  $m$  (g) is the mass of single electrode,  $u$  (V/s) is the scan rate,  $U_2$  and  $U_1$  (V) are the highest and lowest value of the potential window,  $I$  (A) is the instant current.

Table S2 Specific capacitances and retention rates of GNSs and MWNTs  
(calculated by GCD, the electrolyte is 1M H<sub>2</sub>SO<sub>4</sub>)

|            | GNS2        |                  | GNS3        |                  | GNS4        |                  | GNS5        |                  | MWNT        |                  |
|------------|-------------|------------------|-------------|------------------|-------------|------------------|-------------|------------------|-------------|------------------|
|            | Cs<br>(F/g) | Retention<br>(%) |
| <b>0.5</b> | 78.8        | 100              | 80.1        | 100              | 86.7        | 100              | 93.5        | 100              | 40.9        | 100              |
| <b>0.8</b> | 80.5        | 102.1            | 80.7        | 100.9            | 89.1        | 102.8            | 91.9        | 98.2             | 40.4        | 98.8             |
| <b>1</b>   | 80.6        | 102.3            | 81.3        | 101.5            | 90.4        | 104.2            | 91.0        | 97.4             | 40.2        | 98.4             |
| <b>2</b>   | 80.1        | 101.6            | 80.5        | 100.5            | 91.1        | 105.1            | 89.6        | 93.7             | 39.0        | 95.3             |
| <b>5</b>   | 77.3        | 98.1             | 77.4        | 96.6             | 89.2        | 102.8            | 81.5        | 87.2             | 36.4        | 89.1             |
| <b>8</b>   | 75.3        | 95.5             | 74.9        | 93.5             | 87.0        | 100.3            | 77.3        | 82.6             | 34.6        | 84.6             |
| <b>10</b>  | 73.8        | 93.7             | 73.8        | 92.1             | 85.7        | 98.8             | 75.1        | 80.3             | 33.4        | 81.6             |
| <b>20</b>  | 69.6        | 88.3             | 67.7        | 84.6             | 80.8        | 93.2             | 67.4        | 72.1             | 29.4        | 72.0             |
| <b>50</b>  | 61.5        | 78.0             | 56.7        | 70.8             | 72.6        | 83.8             | 56.6        | 60.5             |             |                  |

The specific capacitance of single electrode based on GCD curve is:

$$C_m = \frac{I \times t}{\Delta U \times m}$$

Where  $C_m$  (F/g) is the specific capacitance,  $m$  (g) is the mass of single electrode,  $I$  (mA) is the discharge current,  $t$  (s) is the length of discharge time,  $\Delta U$  (V) is the potential window.

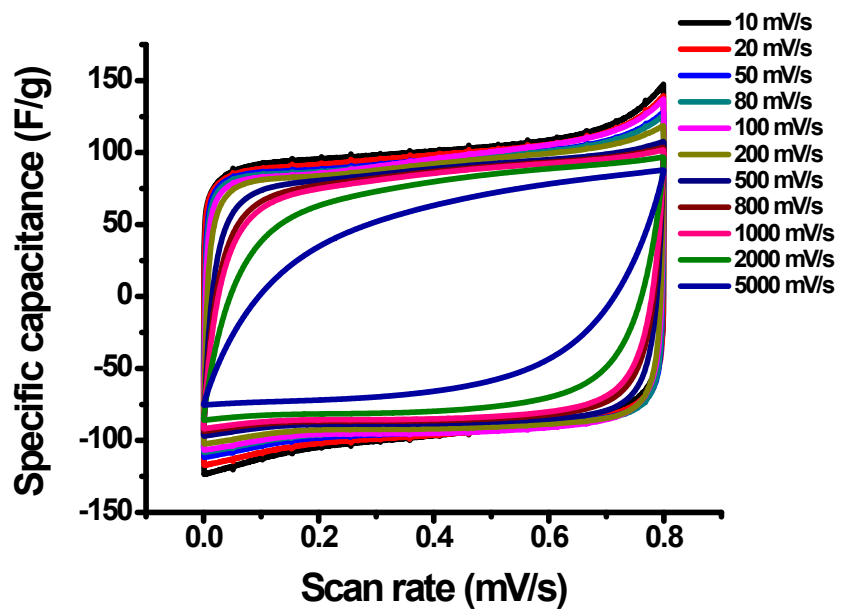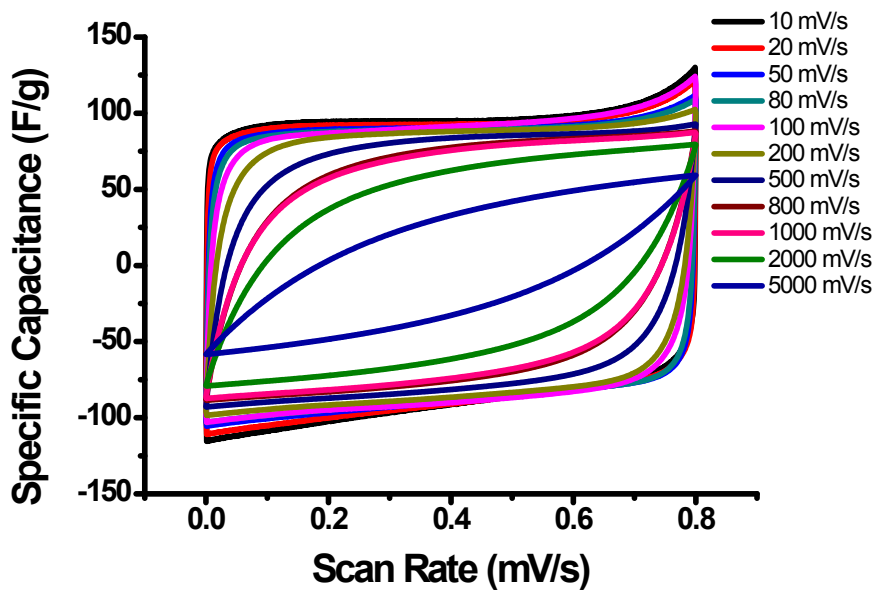

Figure S4. CV curves of AGF1 (top) and AGF2 (bottom), the electrolyte is 1M H<sub>2</sub>SO<sub>4</sub>.



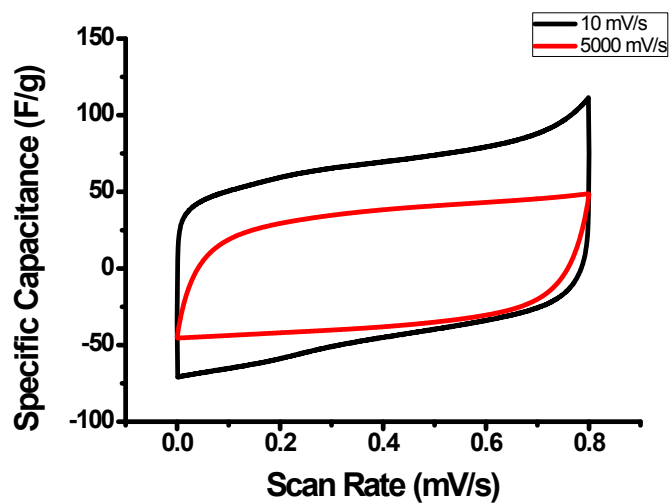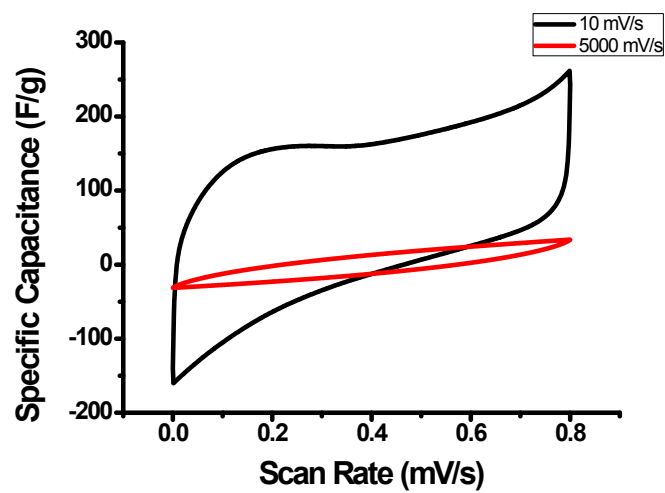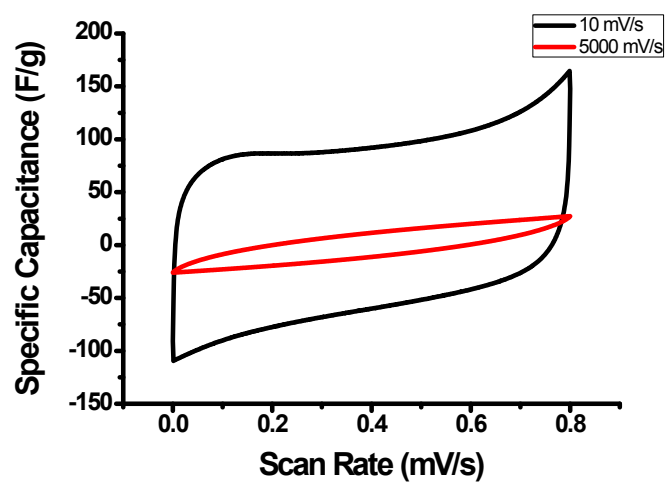

Figure S5. Shape deterioration from 10mV/s to 5000 mV/s of AGF3, RGO and CGF3 (in 1M H<sub>2</sub>SO<sub>4</sub>).

Table S3 Electrochemical performance comparisons of materials in this articles and reported works.

| Ref       | Electrode Materials                                                      | Cs (F/g)  | R (%) | Cs (F/g) | R (%) | Cs (F/g) | R (%) | Cs (F/g) | R (%) | Cs (F/g) | R (%) |
|-----------|--------------------------------------------------------------------------|-----------|-------|----------|-------|----------|-------|----------|-------|----------|-------|
| This work | GNS (1M H <sub>2</sub> SO <sub>4</sub> )                                 | 1 A/g     |       | 10 A/g   |       | 20 A/g   |       | 50 A/g   |       | 100 A/g  |       |
|           |                                                                          | 80.6      | 100   | 73.8     | 91.6  | 69.6     | 86.4  | 61.5     | 76.3  | --       | --    |
| This work | CNT (1M H <sub>2</sub> SO <sub>4</sub> )                                 | 1 A/g     |       | 10 A/g   |       | 20 A/g   |       | 50 A/g   |       | 100 A/g  |       |
|           |                                                                          | 40.9      | 100   | 33.4     | 81.7  | 29.4     | 71.9  | --       | --    | --       | --    |
| This work | AGF (1M H <sub>2</sub> SO <sub>4</sub> )                                 | 1 A/g     |       | 10 A/g   |       | 20 A/g   |       | 50 A/g   |       | 100 A/g  |       |
|           |                                                                          | 166.8     | 100   | 155.2    | 93.0  | 149.6    | 89.7  | 140.0    | 83.9  | 129.1    | 77.4  |
| This work | CGF (1M H <sub>2</sub> SO <sub>4</sub> )                                 | 1 A/g     |       | 10 A/g   |       | 20 A/g   |       | 50 A/g   |       | 100 A/g  |       |
|           |                                                                          | 108.0     | 100   | 90.5     | 83.8  | 75.6     | 70.0  | 44.8     | 41.5  | --       | --    |
| This work | RGO (1M H <sub>2</sub> SO <sub>4</sub> )                                 | 1 A/g     |       | 10 A/g   |       | 20 A/g   |       | 50 A/g   |       | 100 A/g  |       |
|           |                                                                          | 115.7     | 100   | 109.1    | 94.3  | 95.8     | 82.8  | 61.0     | 52.7  | --       | --    |
| 48        | Carbon nanocages (1M H <sub>2</sub> SO <sub>4</sub> )                    | 1 A/g     |       | 10 A/g   |       | 100 A/g  |       | --       |       | --       |       |
|           |                                                                          | 216       | 100   | 178      | 82.4  | 112      | 51.9  | --       | --    | --       | --    |
| 49        | Folded structured graphene paper (1M H <sub>2</sub> SO <sub>4</sub> )    | 1 A/g     |       | 50 A/g   |       | 100 A/g  |       | --       |       | --       |       |
|           |                                                                          | 172       | 100   | 135      | 78.5  | 110      | 64.0  | --       | --    | --       | --    |
| 50        | Self-stacked solvated graphene film (1M H <sub>2</sub> SO <sub>4</sub> ) | 0.108 A/g |       | 100 A/g  |       | --       |       | --       |       | --       |       |
|           |                                                                          | 215       | 100   | 180      | 83.7  | --       | --    | --       | --    | --       | --    |
| 51        | Vertically oriented graphene (6M KOH)                                    | 1 A/g     |       | 20 A/g   |       | 100 A/g  |       | --       |       | --       |       |
|           |                                                                          | 185       | 100   | 165      | 89.2  | 156      | 84.3  | --       | --    | --       | --    |

|    |                                                                  |       |     |        |      |        |      |         |      |    |    |
|----|------------------------------------------------------------------|-------|-----|--------|------|--------|------|---------|------|----|----|
| 53 | Wrinkle-structured graphene (1M H <sub>2</sub> SO <sub>4</sub> ) | 1 A/g |     | 10 A/g |      | 50 A/g |      | 100 A/g |      | -- |    |
|    |                                                                  | 177   | 100 | 170    | 96.0 | 152    | 85.9 | 140     | 79.1 | -- | -- |
| 54 | Non-stacked reduced graphene oxide (6M KOH)                      | 1 A/g |     | 30 A/g |      | --     |      | --      |      | -- |    |
|    |                                                                  | 236.8 | 100 | 171.2  | 72.3 | --     | --   | --      | --   | -- | -- |

Cs and R refer to gram specific capacitance and retention rate, respectively.

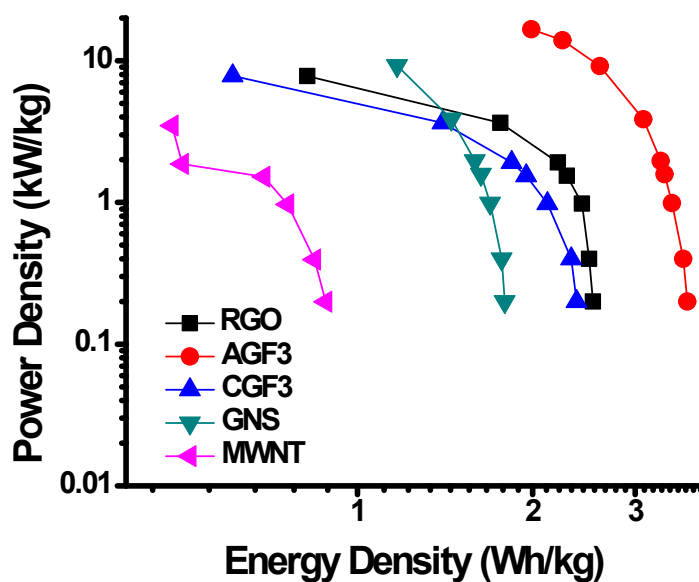

Figure S6. Ragone plots of the materials used in this article (aqueous electrolyte, based on GCD tests).

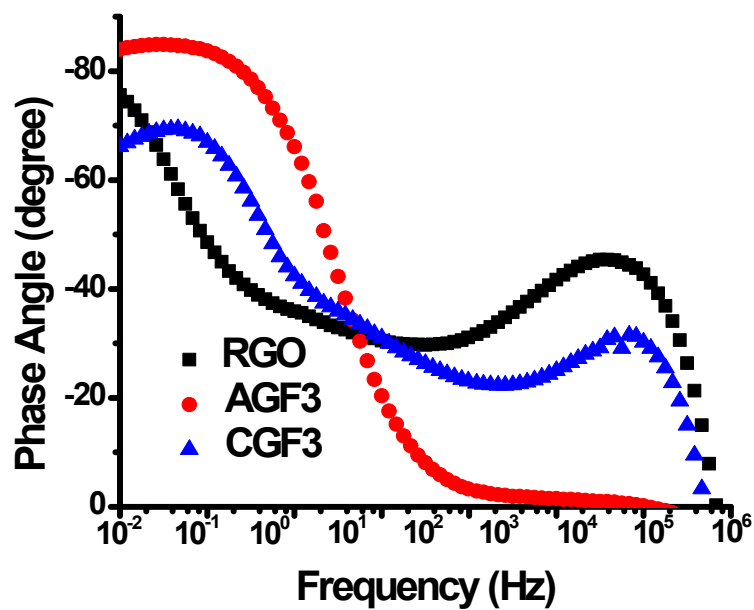

Figure S7. Phase angle-frequency relationship for RGO, AGF3 and CGF3 in 1M H<sub>2</sub>SO<sub>4</sub>.

Table S4 Specific capacitances and retention rates of RGO film, AGFs and CGFs tested in organic electrolyte. (Calculated by CV)

| Scan rate (mV/s) | RGO      |               | AGF3     |               | CGF3     |               |
|------------------|----------|---------------|----------|---------------|----------|---------------|
|                  | Cs (F/g) | Retention (%) | Cs (F/g) | Retention (%) | Cs (F/g) | Retention (%) |
| 10               | 84.4     | 100           | 113.5    | 100           | 87.7     | 100           |
| 20               | 61.8     | 73.3          | 87.5     | 77.0          | 59.2     | 67.5          |
| 50               | 35.5     | 42.0          | 57.7     | 50.8          | 33.3     | 37.9          |
| 80               | 25       | 29.6          | 43.9     | 38.7          | 25.2     | 28.6          |
| 100              | 20.6     | 24.4          | 38.1     | 33.5          | 22.1     | 25.2          |
| 200              | 12.1     | 14.3          | 25.0     | 22.0          | 15.0     | 17.1          |
| 500              | 6.6      | 7.9           | 13.8     | 12.1          | 8.9      | 10.2          |
| 800              | 4.9      | 5.8           | 10.2     | 8.9           | 6.8      | 7.8           |
| 1000             | 4.5      | 5.3           | 8.8      | 7.8           | 6.2      | 7.0           |
| 2000             | 2.9      | 3.5           | 5.7      | 5.0           | 3.9      | 4.5           |
| 5000             | 1.5      | 1.8           | 3.1      | 2.7           | 2.0      | 2.3           |

Table S5 Specific capacitances and retention rates of RGO film, AGFs and CGFs tested in organic electrolyte. (Calculated by GCD)

| Current density (A/g) | RGO      |               | AGF3     |               | CGF3     |               |
|-----------------------|----------|---------------|----------|---------------|----------|---------------|
|                       | Cs (F/g) | Retention (%) | Cs (F/g) | Retention (%) | Cs (F/g) | Retention (%) |
| 1                     | 100.9    | 100           | 122.2    | 100           | 112.3    | 100           |
| 2                     | 54.1     | 53.6          | 88.7     | 72.6          | 55.7     | 49.6          |
| 5                     | 15.5     | 15.4          | 45.1     | 36.9          | 17.2     | 15.3          |
| 8                     | 6.1      | 6.1           | 27.6     | 22.6          | 8.3      | 7.4           |
| 10                    | 3.8      | 3.8           | 14.6     | 12.0          | 5.7      | 5.1           |
| 20                    | 0.001    | 0.001         | 4.8      | 3.9           | 1.4      | 1.2           |

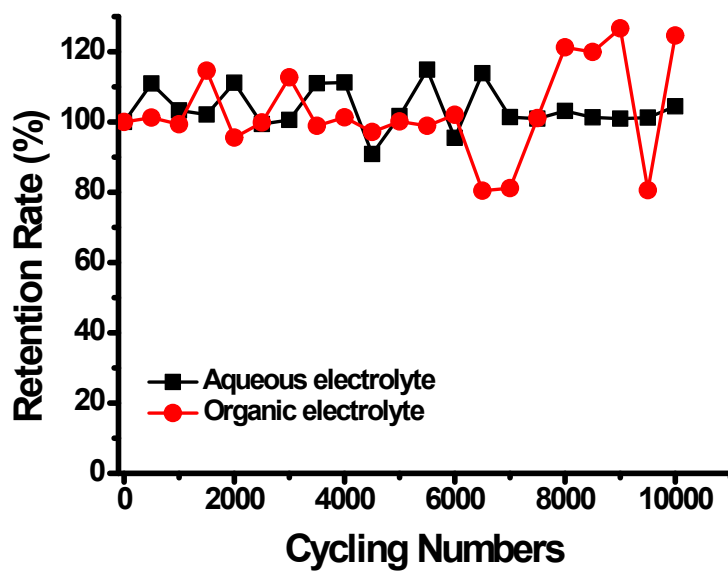

Figure S8. Cycling stability tests of AGF3 in aqueous electrolyte (1M H<sub>2</sub>SO<sub>4</sub>) and organic electrolyte (1M EMIM<sup>+</sup> BF<sub>4</sub><sup>-</sup> in AN) at 5 A/g.

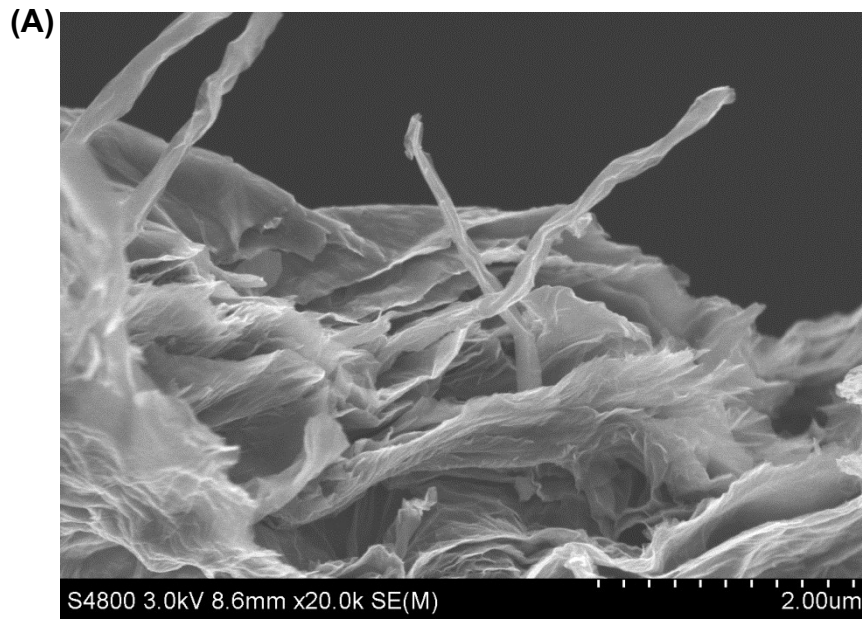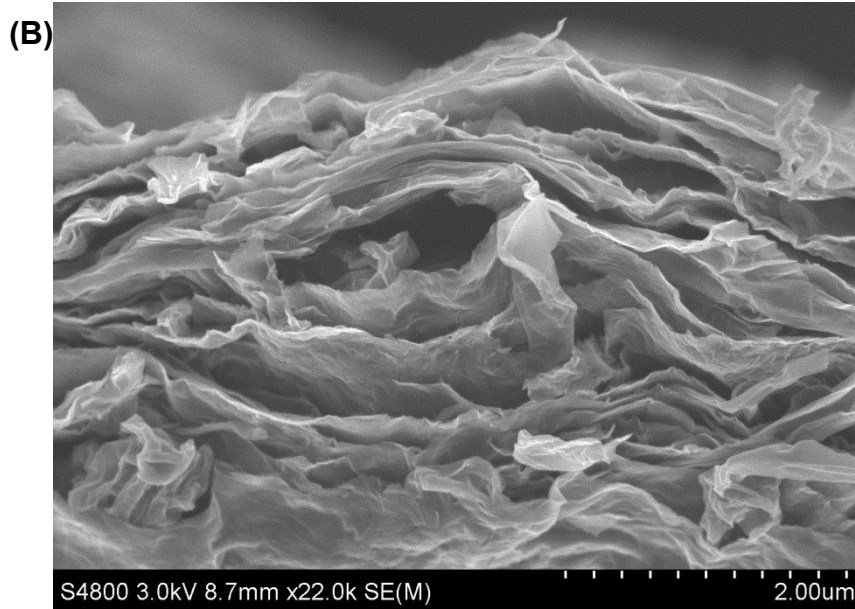



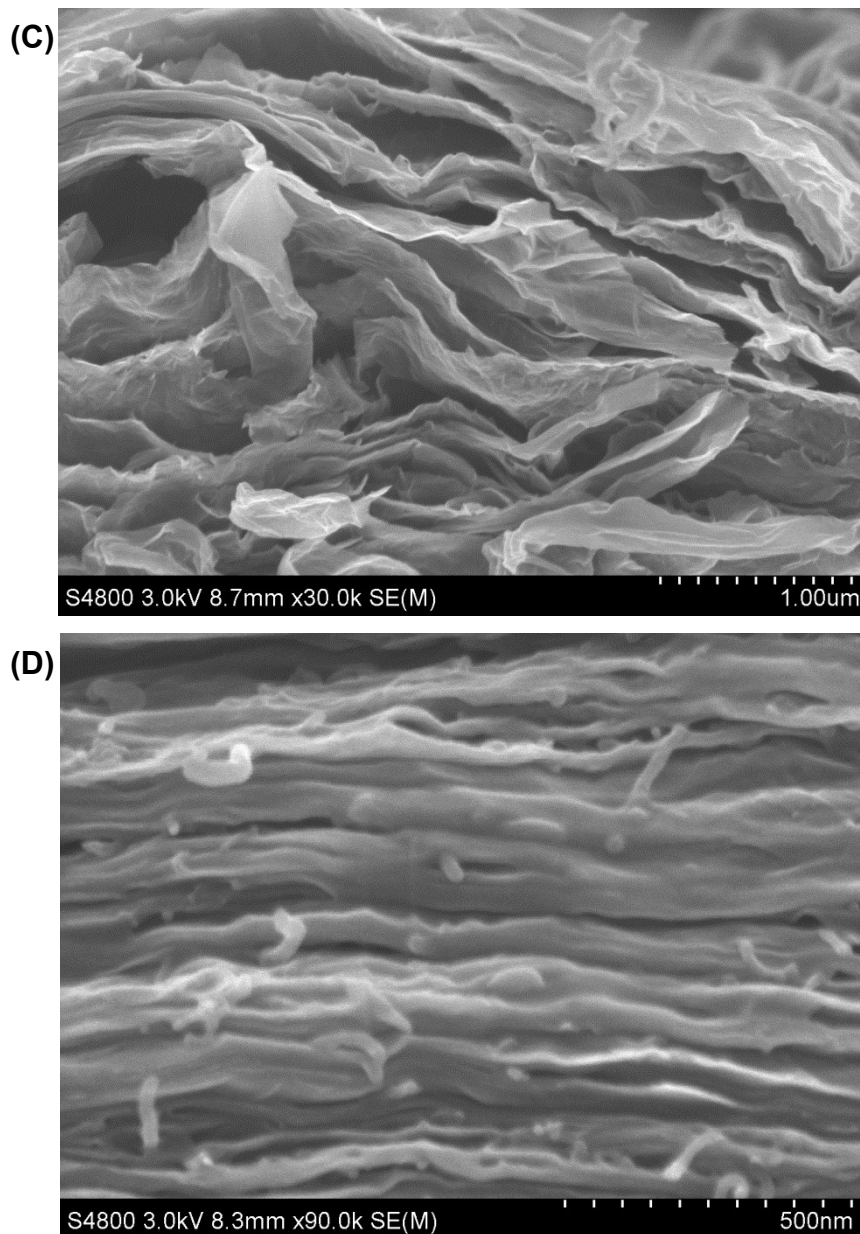

Figure S9. (A) Magnified SEM images of AGF3 in Figure 4B; (B) and (C) SEM images of other AGF3 sample; (D) Magnified SEM images of CGF3 in Figure 4C.
